# Supplementary material for: Enhanced piezo-phototronic effect in carbon nitride nanosheets via oxidative exfoliation for high-efficiency piezo-photocatalysis
Source: Royal Society of Chemistry journal article supplement (doi:10.1039/d4ta07713j), 2025-01-01
Supplement: d4ta07713j1.pdf [file d4ta07713j1.pdf]

Supporting Information for

**Enhanced Piezo-Phototronic Effect in Carbon Nitride Nanosheets via  
Oxidative Exfoliation for High-Efficiency Piezo-Photocatalysis**

Xinyue Yan,<sup>a</sup> Jiandong Zhu,<sup>a</sup> Yonghui Liu,<sup>b</sup> Yazhi Liu,<sup>\*a, c</sup> Huan He,<sup>a</sup> Chenmin Xu,<sup>a</sup>  
Shaogui Yang,<sup>\*a</sup> Qiuyi Ji,<sup>a</sup> Kai Wang,<sup>\*c</sup> Shaomin Liu<sup>d</sup>

<sup>a</sup> *School of Environment, Nanjing Normal University, Jiangsu Engineering Lab of Water and Soil Eco-Remediation, Nanjing 210023, China*

<sup>b</sup> *School of Information Engineering, East China University of Technology, Nanchang 330013, China*

<sup>c</sup> *WA School of Mines: Minerals, Energy and Chemical Engineering, Curtin University, Perth, WA, 6102 Australia*

<sup>d</sup> *School of Engineering, Great Bay University, Dongguan 523000, China*

\* Corresponding authors:

*E-mail addresses:* [yazi.liu@njnu.edu.cn](mailto:yazi.liu@njnu.edu.cn) (Y. Liu), [yangsg@njnu.edu.cn](mailto:yangsg@njnu.edu.cn) (S. Yang),  
[kai.wang2@curtin.edu.au](mailto:kai.wang2@curtin.edu.au) (K. Wang)

### Text S1 Photoelectrochemical measurements

The photocurrent–time response ( $I-t$ ), electrochemical impedance spectroscopy (EIS) spectra and Mott–Schottky (M-S) diagrams were obtained using a standard three-electrode system on a CHI660E electrochemical station. The parameters of the electrochemical three-electrode workstation were as follows: 0.5 M  $\text{Na}_2\text{SO}_4$  solution was configured as test electrolyte. An Ag/AgCl (saturated KCl) electrode served as the reference electrode, while a platinum wire electrode served as the counter electrode. The material was applied in thin layers on a  $1\text{ cm} \times 1\text{ cm}$  fluorine-doped tin oxide (FTO) coating, which was secured to act as the working electrode using a platinum plate electrode holder. The applied bias for photocurrent measurement was set to 0.4 V. Mott-Schottky measurements were conducted at frequencies of 1000 Hz.

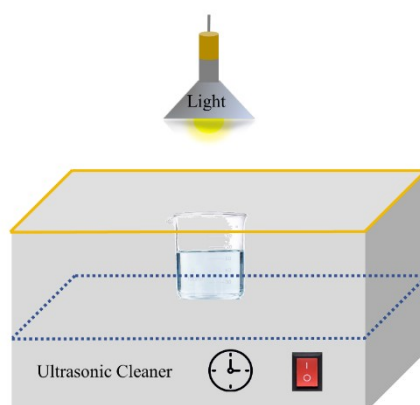

**Figure S1.** Scheme of the piezo-photocatalysis reaction equipment.

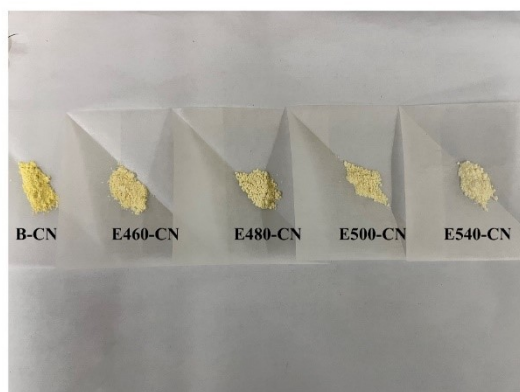

**Figure S2.** Color change of the samples from B-CN to E540-CN.

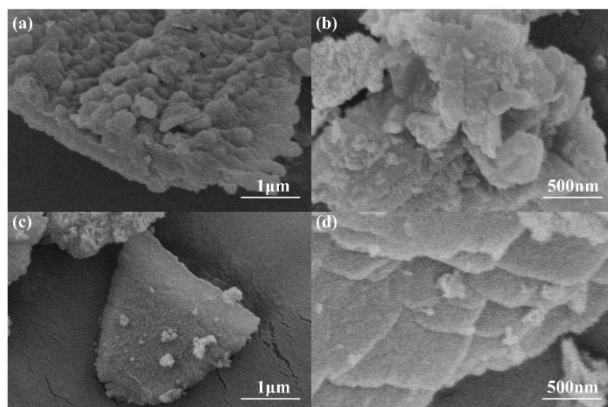

**Figure S3.** (a–b) SEM images of B-CN, (c–d) SEM images of E500-CN.

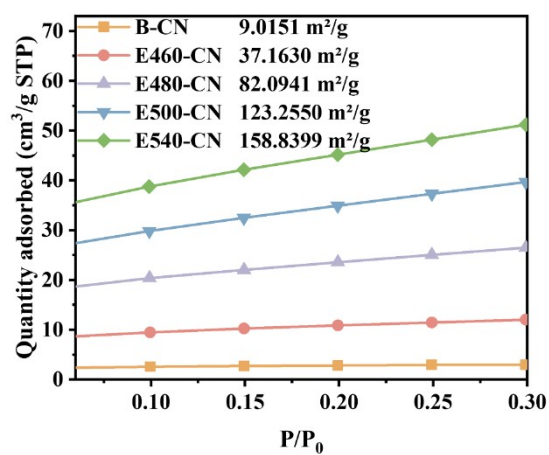

**Figure S4.** Specific surface area of all samples.

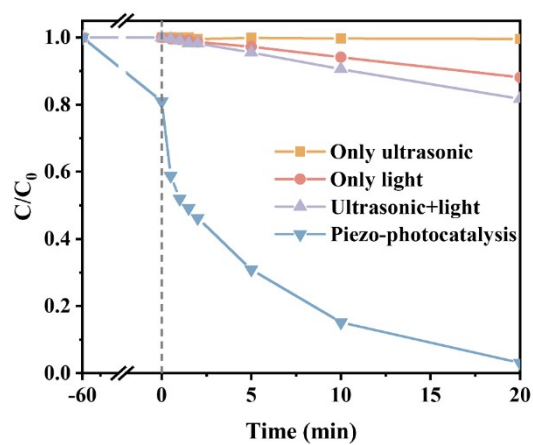

**Figure S5.** Degradation experiments without catalyst.

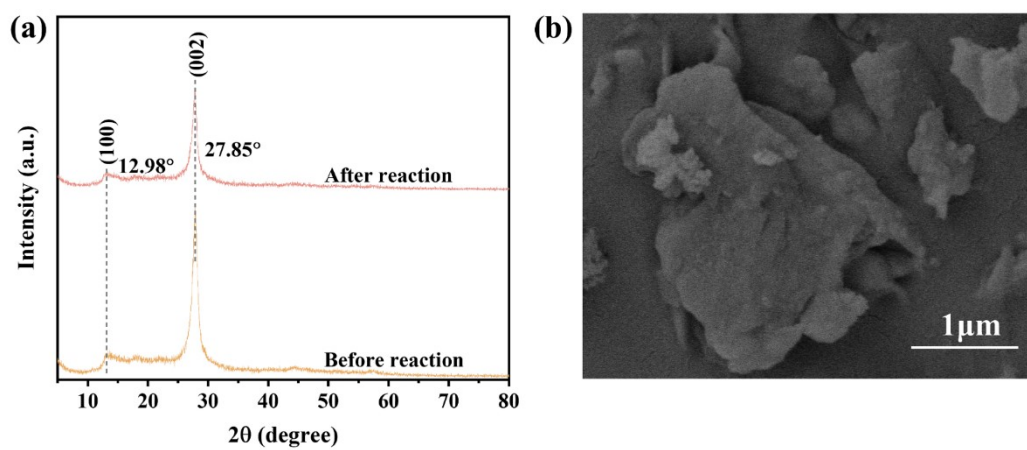

**Figure S6.** (a) XRD of E500-CN after reaction. (b) SEM of E500-CN after reaction.

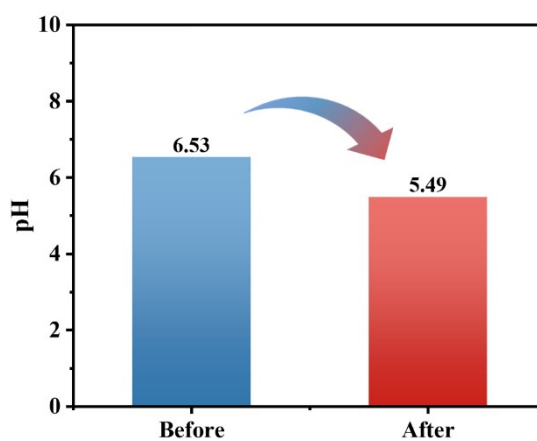

**Figure S7.** The pH variation during MB degradation by the piezo-photocatalysis process.

Experimental conditions:  $[\text{catalyst}]_0 = 0.6 \text{ g/L}$ ,  $[\text{MB}]_0 = 10 \text{ mg/L}$ .

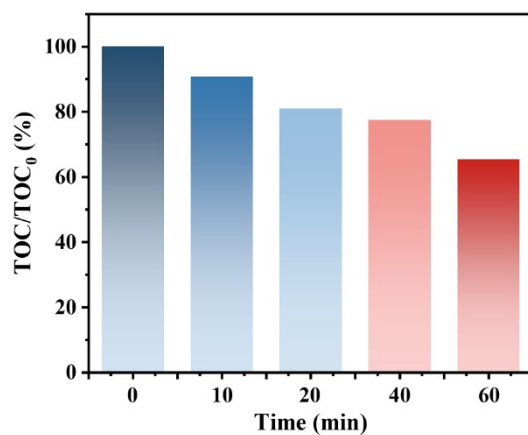

**Figure S8.** The change of TOC in the piezo-photocatalytic MB degradation system.

Experimental conditions: [catalyst]<sub>0</sub> = 0.6 g/L, [MB]<sub>0</sub> = 10 mg/L.

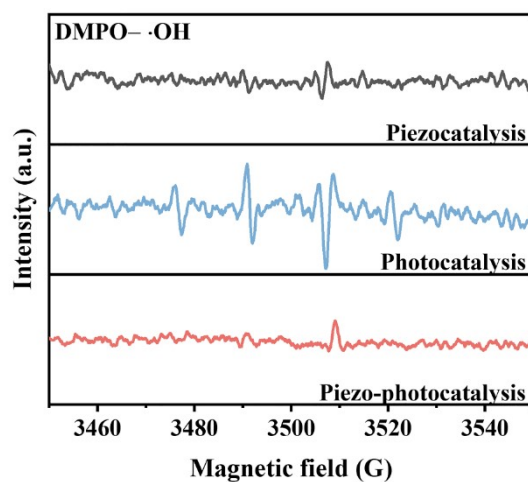

**Figure S9.** EPR spectra of DMPO-·OH in piezocatalysis, photocatalysis and piezo-photocatalysis of E500-CN.

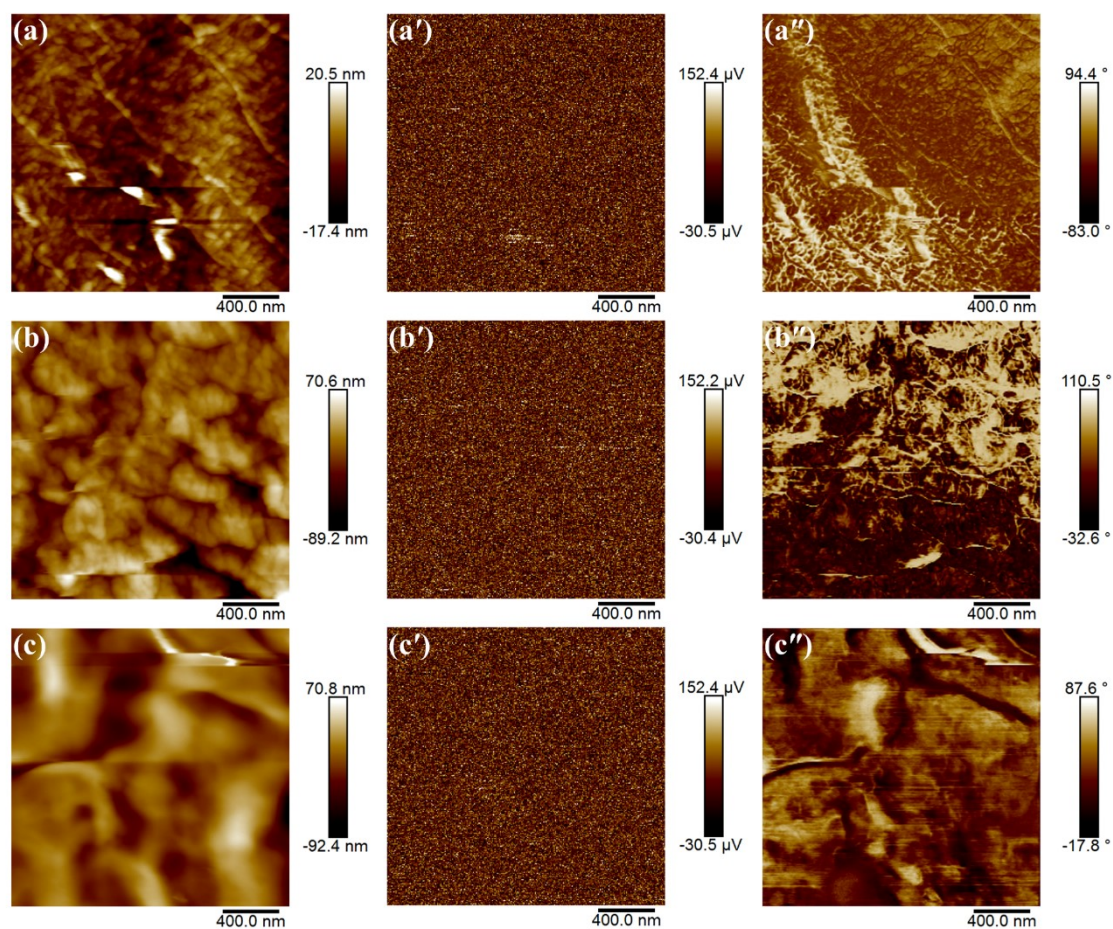

**Figure S10.** (a–c) PFM topographic images, (a'–c') amplitude images, (a''–c'') phase images of B-CN, E500-CN and E540-CN.

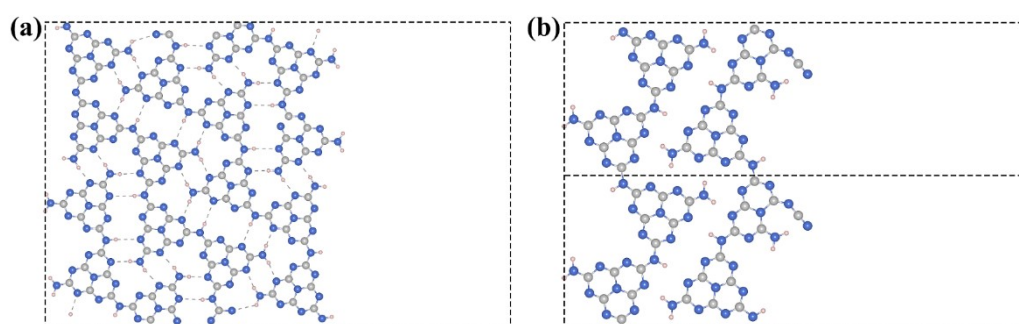

**Figure S11.** The atomic structure of (a) E500-CN with hydrogen bonds and (b) E540-CN with cyano. H, C, and N atoms are denoted by small yellow, large white, and light blue balls, respectively.

**Table S1.** The degradation efficiencies for MB in different catalytic systems.

| Catalysts                                      | Pollutants    | Catalyst dosage (g/L) | Removal efficiencies                                           | Reactions conditions                                                                          | Ref.      |
|------------------------------------------------|---------------|-----------------------|----------------------------------------------------------------|-----------------------------------------------------------------------------------------------|-----------|
| E500-CN                                        | MB;<br>10 ppm | 0.6                   | 20 min - 97%;<br>$k_{\text{obs}} = 0.152 \text{ min}^{-1}$     | 300 W Xe lamp;<br>ultrasonic cleaner (120 W, 40 kHz)                                          | This work |
| carbon-rich CN                                 | MB;<br>5 ppm  | 0.5                   | $k_{\text{obs}} = 0.0454 \text{ min}^{-1}$                     | ultrasonic cleaner (150 W, 40 kHz)                                                            | [1]       |
| $\text{Bi}_2\text{MoO}_6$                      | MB;<br>10 ppm | 0.5                   | $k_{\text{obs}} = 0.0196 \text{ min}^{-1}$                     | ultrasonic cleaner (150 W, 40 kHz)                                                            | [2]       |
| $\text{ZnO/g-C}_3\text{N}_4\text{-Ni}$<br>foam | MB;<br>10 ppm | -                     | 80 min - 99%                                                   | 300 W Xe lamp;<br>mechanical agitator                                                         | [3]       |
| $\alpha\text{-Fe}_2\text{O}_3/\text{PVDF}$     | MB;<br>1 ppm  | 0.35                  | 60 min - 99.5%;<br>$k_{\text{obs}} = 0.052 \text{ min}^{-1}$   | 250 W mercury lamp;<br>ultrasonic cleaner (250 W, 18 kHz)                                     | [4]       |
| $\text{PVDF/BiFeO}_3$                          | MB;<br>1 ppm  | 0.25                  | 45 min - 93%;<br>$k_{\text{obs}} = 0.065 \text{ min}^{-1}$     | 250 W mercury lamp;<br>ultrasonic cleaner (360 W, 40 kHz)                                     | [5]       |
| $\text{Ag}_2\text{S/ZnO}$                      | MB;<br>1 ppm  | -                     | 120 min - 100%                                                 | simulated solar light (320-800 nm,<br>80 mW/cm <sup>2</sup> );<br>ultrasonic cleaner (45 kHz) | [6]       |
| $\text{ZnO/CuS}$                               | MB;<br>5 ppm  | 2                     | 20 min - 100%;<br>$k_{\text{obs}} = 0.182 \text{ min}^{-1}$    | 500 W Xe lamp (200-1100 nm);<br>ultrasonic probe (200 W)                                      | [7]       |
| $\text{ZnO/ZnS}$                               | MB;<br>5 ppm  | -                     | 50 min - 60.7%                                                 | UV irradiation;<br>ultrasonic cleaner                                                         | [8]       |
| $\text{ZnO/ZnS/MoS}_2$                         | MB;<br>10 ppm | 0.2                   | 50 min - 87.14%;<br>$k_{\text{obs}} = 0.0411 \text{ min}^{-1}$ | 300 W Xe lamp;<br>mechanical agitator                                                         | [9]       |
| $\text{Ag}_3\text{PO}_4/\text{ZnO}$            | MB;<br>-      | -                     | 30 min - 98.16%;<br>$k_{\text{obs}} = 0.1341 \text{ min}^{-1}$ | 300 W Xe lamp ( $\lambda > 420 \text{ nm}$ );<br>ultrasonic cleaner (50 W, 40 kHz)            | [10]      |

## Reference

- [1] X. C. Liu, J. R. Zhang, M. W. Wang, Y. Li, X. X. Li, L. H. Wang, J. L. Li and F. Li, *ACS Appl. Mater. Interfaces*, 2024, **16**, 49318-49327.
- [2] T. Chen, Z. J. Zhu, F. Chen, C. Hu and H. W. Huang, *Appl. Surf. Sci.*, 2023, **616**, 156467.
- [3] Z. Q. Ren, J. W. Xie, X. Li, L. X. Guo, Q. W. Zhang, J. Z. Wu, Y. Q. Li, W. L. Liu, P. Li, Y. M. Fu, K. Y. Zhao and J. Ma, *J. Colloid Interface Sci.*, 2023, **632**, 271-284.
- [4] F. Orudzhev, S. Ramazanov, D. Sobola, P. Kaspar, T. Trčka, K. Částková, J. Kastyl, I.

Zvereva, C. Wang, D. Selimov, R. Gulakhmedov, M. Abdurakhmanov, A. Shuaibov and M. Kadiev, *Nano Energy*, 2021, **90**, 106586.

[5] F. Orudzhev, D. Sobola, S. Ramazanov, K. Castkova, N. Papez, D. A. Selimov, M. Abdurakhmanov, A. Shuaibov, A. Rabadanova, R. Gulakhmedov and V. Holcman, *Polymers (Basel)*, 2023, **15**, 246.

[6] Y. Zhang, C. H. Liu, G. L. Zhu, X. Huang, W. Liu, W. G. Hu, M. Song, W. D. He, J. Liu and J. Y. Zhai, *RSC Adv.*, 2017, **7**, 48176-48183.

[7] D. Y. Hong, W. L. Zang, X. Guo, Y. M. Fu, H. X. He, J. Sun, L. L. Xing, B. D. Liu and X. Y. Xue, *ACS Appl. Mater. Interfaces*, 2016, **8**, 21302-21314.

[8] Z. Q. Ren, X. Li, L. X. Guo, J. Z. Wu, Y. Q. Li, W. L. Liu, P. Li, Y. M. Fu and J. Ma, *Mater. Lett.*, 2021, **292**, 129635.

[9] Y. M. Fu, Y. J. Wang, H. X. Zhao, Z. L. Zhang, B. N. An, C. Z. Bai, Z. Q. Ren, J. Z. Wu, Y. Q. Li, W. L. Liu, P. Li and J. Ma, *Appl. Surf. Sci.*, 2021, **556**, 149695.

[10] Y. Yu, B. H. Yao, Y. Q. He, B. Y. Cao, Y. L. Ren and Q. Q. Sun, *Appl. Surf. Sci.*, 2020, **528**, 146819.
